# Supplementary material
Source: MDPI journal article supplement (https://www.mdpi.com/2410-390X/7/4/40)
Supplement: s1 [file s1]

# Supplementary Materials: A Compact Particle Detector for Space-Based Applications: Development of a Low-Energy Module (LEM) for the NUSES Space Mission

## 1. NUSES Full Authorlist

R. Aloisio<sup>1,2</sup>, C. Altomare<sup>3</sup>, F. C. T. Barbato<sup>1,2</sup>, R. Battiston<sup>4,5</sup>, M. Bertaina<sup>6,7</sup>, E. Bissaldi<sup>3,8</sup>, D. Boncioli<sup>2,9</sup>, L. Burmistrov<sup>10</sup>, I. Cagnoli<sup>1,2</sup>, M. Casolino<sup>11,12</sup>, A.L. Cummings<sup>13</sup>, N. D'Ambrosio<sup>2</sup>, I. De Mitri<sup>1,2</sup>, G. De Robertis<sup>3</sup>, C. De Santis<sup>11</sup>, A. Di Giovanni<sup>1,2</sup>, A. Di Salvo<sup>7</sup>, M. Di Santo<sup>1,2</sup>, L. Di Venere<sup>3</sup>, J. Eser<sup>14</sup>, M. Fernandez Alonso<sup>1,2</sup>, G. Fontanella<sup>1,2</sup>, P. Fusco<sup>3,8</sup>, S. Garbolino<sup>7</sup>, F. Gargano<sup>3</sup>, R. A. Giampaolo<sup>1,7</sup>, M. Giliberti<sup>3,8</sup>, F. Guarino<sup>15,16</sup>, M. Heller<sup>10</sup>, R. Iuppa<sup>4,5</sup>, J. F. Krizmanic<sup>17,18</sup>, A. Lega<sup>4,5</sup>, F. Licciulli<sup>3</sup>, F. Loparco<sup>3,8</sup>, L. Lorusso<sup>3,8</sup>, M. Mariotti<sup>19,20</sup>, M. N. Mazziotta<sup>3</sup>, M. Mese<sup>15,16</sup>, H. Miyamoto<sup>1,7</sup>, T. Montaruli<sup>10</sup>, A. Nagai<sup>10</sup>, R. Nicolaidis<sup>4,5</sup>, F. Nozzoli<sup>4,5</sup>, A. V. Olinto<sup>14</sup>, D. Orlandi<sup>2</sup>, G. Osteria<sup>15</sup>, P. A. Palmieri<sup>6,7</sup>, B. Panico<sup>15,16</sup>, G. Panzarini<sup>3,8</sup>, A. Parenti<sup>1,2</sup>, L. Perrone<sup>21,22</sup>, P. Picozza<sup>12,11</sup>, R. Pillera<sup>3,8</sup>, R. Rando<sup>19,20</sup>, M. Rinaldi<sup>11</sup>, A. Rivetti<sup>7</sup>, V. Rizi<sup>2,9</sup>, F. Salamida<sup>2,9</sup>, E. Santero Mormile<sup>6</sup>, V. Scherini<sup>21,22</sup>, V. Scotti<sup>15,16</sup>, D. Serini<sup>3</sup>, I. Siddique<sup>1,2</sup>, L. Silveri<sup>1,2</sup>, A. Smirnov<sup>1,2</sup>, R. Sparvoli<sup>11</sup>, S. Tedesco<sup>7,23</sup>, C. Trimarelli<sup>10</sup>, L. Wu<sup>1,2,†</sup>, P. Zuccon<sup>4,5</sup>, S. C. Zugravel<sup>7,23</sup>.

<sup>1</sup>Gran Sasso Science Institute (GSSI), Via Iacobucci 2, I-67100 L'Aquila, Italy

<sup>2</sup>Istituto Nazionale di Fisica Nucleare (INFN) - Laboratori Nazionali del Gran Sasso, I-67100 Assergi, L'Aquila, Italy

<sup>3</sup>Istituto Nazionale di Fisica Nucleare, Sezione di Bari, via Orabona 4, I-70126 Bari, Italy

<sup>4</sup>Dipartimento di Fisica, Università di Trento, via Sommarive 14 I-38123 Trento, Italy

<sup>5</sup>Istituto Nazionale di Fisica Nucleare (INFN) - TIFPA, via Sommarive 14 I-38123 Trento, Italy

<sup>6</sup>Dipartimento di Fisica, Università di Torino, Via P. Giuria, 1 I-10125 Torino, Italy

<sup>7</sup>Istituto Nazionale di Fisica Nucleare (INFN) - Sezione di Torino, I-10125 Torino, Italy

<sup>8</sup>Dipartimento di Fisica M. Merlin, dell'Università e del Politecnico di Bari, via Amendola 173, I-70126 Bari, Italy

<sup>9</sup>Dipartimento di Scienze Fisiche e Chimiche, Università degli Studi di L'Aquila, I-67100 L'Aquila, Italy

<sup>10</sup>Département de Physique Nucléaire et Corpusculaire, Université de Genève, 1205 Genève, Switzerland

<sup>11</sup>INFN Roma Tor Vergata, Dipartimento di Fisica, Università di Roma Tor Vergata, Roma, Italy

<sup>12</sup>RIKEN, 2-1 Hirosawa, Wako, Saitama, Japan

<sup>13</sup>Departments of Physics and Astronomy & Astrophysics, Institute for Gravitation and the Cosmos, Pennsylvania State University, University Park, PA 16802, USA

<sup>14</sup>Department of Astrophysics & Astronomy, The University of Chicago, Chicago, IL 60637, USA

<sup>15</sup>Istituto Nazionale di Fisica Nucleare, Sezione di Napoli, via Cintia, I-80126 Napoli, Italy

<sup>16</sup>Dipartimento di Fisica E. Pancini dell'Università di Napoli Federico II, via Cintia, I-80126 Napoli, Italy

<sup>17</sup>CRESST/NASA Goddard Space Flight Center, Greenbelt, MD 20771, USA

<sup>18</sup>University of Maryland, Baltimore County, Baltimore, MD 21250, USA

<sup>19</sup>Università di Padova, I-35122 Padova, Italy

<sup>20</sup>Istituto Nazionale di Fisica Nucleare (INFN) - Sezione di Padova, I-35131 Padova, Italy

<sup>21</sup>Dipartimento di Matematica e Fisica "E. De Giorgi", Università del Salento, Via per Arnesano, I-73100 Lecce, Italy

<sup>22</sup>Istituto Nazionale di Fisica Nucleare - INFN - Sezione di Lecce, Via per Arnesano, I-73100 Lecce, Italy

<sup>23</sup>Department of Electrical, Electronics and Communications Engineering, Politecnico di Torino, Corso Duca degli Abruzzi 24, I-10129 Torino, Italy

<sup>†</sup>Now at Institute of Deep Space Sciences, Deep Space Exploration Laboratory, Hefei 230026, China
